# Supplementary material for: Ac-EAZY! Towards GMP-Compliant Module Syntheses of 225Ac-Labeled Peptides for Clinical Application
Source: MDPI journal article supplement (doi:10.3390/ph14070652), 2021-07-06
Supplement: s1 [file s1]

# Ac-EAZY! Towards GMP-compliant module syntheses of $^{225}\text{Ac}$ -labeled peptides for clinical application

M. Pretze<sup>1,2\*</sup>, F. Kunkel<sup>3</sup>, R. Runge<sup>1</sup>, R. Freudenberg<sup>1</sup>, A. Braune<sup>1</sup>, H. Hartmann<sup>1</sup>, U. Schwarz<sup>4</sup>,  
C. Brogsitter<sup>1</sup> and J. Kotzerke<sup>1\*</sup>

<sup>1</sup> Department of Nuclear Medicine, University Hospital Carl Gustav Carus, Technical University Dresden, 01307 Dresden, Germany

<sup>2</sup> Molecular Imaging and Radiochemistry, Department of Clinical Radiology and Nuclear Medicine, Medical Faculty Mannheim of Heidelberg University, 68167 Mannheim, Germany

<sup>3</sup> Eckert & Ziegler Eurotope, Berlin, Germany

<sup>4</sup> Eckert & Ziegler Radiopharma, Braunschweig, Germany

## Supporting information

### Step-by-step description of the automated $^{225}\text{Ac}$ -peptide synthesis

A total of 6–18 MBq  $^{225}\text{Ac}$ -salt in 100–500  $\mu\text{L}$  0.04–0.1 M HCl was obtained from ITM (Garching, Germany) or E&Z (Braunschweig, Germany) as starting radioactivity in a KIMAX vial.

- For C18 method only: Attach C18 cartridge to the cassette and add 2 mL EtOH<sub>absolute</sub> to reactor for automated C18 conditioning.
- For CM method only: Rinse CM cartridge with 3 mL H<sub>2</sub>O<sub>suprapur</sub> and attach in dry state to the cassette.
- Mix peptide with buffer in syringe; attach short cannula (B.Braun 4657667).

- Remove blue micropin (B.Braun MP1000) from gold-capped vial and add buffer from syringe, attach micropin.
- For C18 method only: Remove blue micropin from red-capped vial and add eluent, attach micropin.
- Attach two sterile filters to a vented product vial and connect with product line.
- Attach both green lines to saline completely with a long cannula (B.Braun 4665791) to the reactor and a short cannula (B.Braun 4657667) coming from the cassette.
- Attach both red lines to KIMAX vial (contains activity) completely with a long cannula (B.Braun 4665791) to the reactor and a short cannula (B.Braun 4657667) coming from the buffer vial.

1<sup>st</sup> minute: the reactor is preheated to 50°C for 2 minutes.

3<sup>rd</sup> minute: <sup>225</sup>Ac-salt is transported into reaction vial and the activity vial is simultaneously rinsed with 2.1 mL buffer-precursor mixture into the reaction vial.

4<sup>th</sup> minute: the reaction at 105°C for 35 minutes.

39<sup>th</sup> minute: the reactor is switched off for 5 minutes to cool.

43<sup>rd</sup> minute: 2 mL of saline is added into the reactor and the diluted reaction solution is transferred through the cartridge.

44<sup>th</sup> minute: 2 mL of saline is added into the reactor to remove residual activity and the solution is transferred through the cartridge.

45<sup>th</sup> minute: 2 mL of saline is added into the reactor and to remove residual activity and the solution is transferred to the cartridge.

46<sup>th</sup> minute: the residual reactor content is completely transferred through the CM cartridge and two sterile filters into the product vial with transfer pressure 1.4 bar.

(For C18: 46<sup>th</sup> minute: C18 cartridge is eluted with 1.5 mL eluent through two sterile filters into the product vial.

48<sup>th</sup> minute: 7.5 mL saline are added through the reactor for dilution of the product.

49<sup>th</sup> minute: the saline from the reactor is completely transferred through the C18 and the two sterile filter into the product vial with transfer pressure 1.4 bar).

48<sup>th</sup> (50<sup>th</sup>) minute: the final <sup>225</sup>Ac-labeled peptide is colorless and is ready for injection in a volume of 8 mL (CM method) or 10 mL (C18 method), pH  $6.0 \pm 0.2$  and an endotoxin level <5.0 EU/mL. For C18 method, the content of EtOH in the final injection solution is 7.5%. After 48–50 min synthesis time the RCYs are 80–90% with RCPs >95%. The dose for the personnel was 1–2  $\mu$ Sv in 1 h, which accounts mostly for the normal background radiation, regardless of manual or automated synthesis.

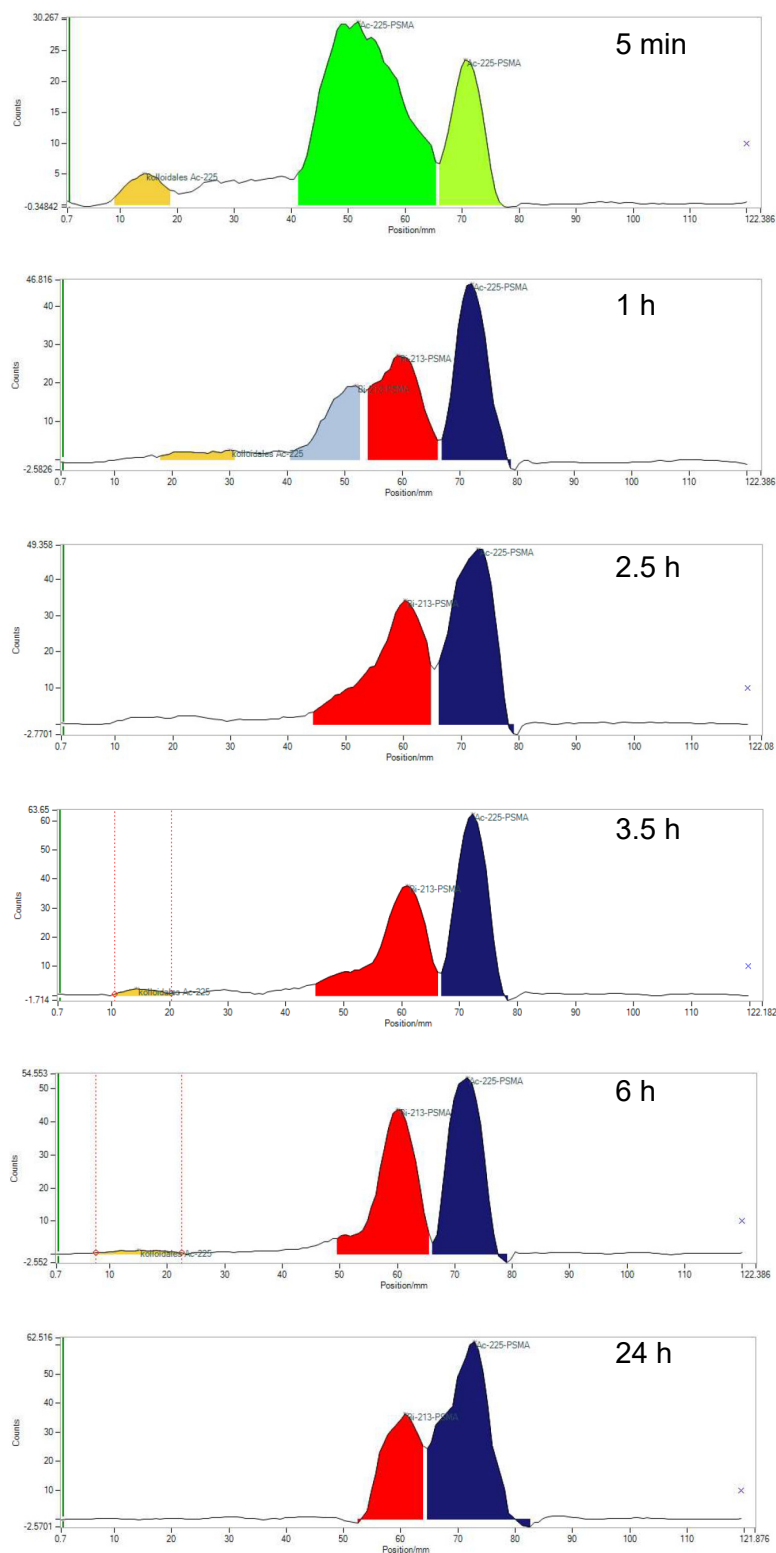

Figure S1. Analytical radio-TLC of  $^{225}\text{Ac}$ -PSMA-I&T 1 M  $\text{NH}_4\text{Ac}$ :MeOH 1:1 on ITLC-SG). From top to bottom: 5 min, 1 h, 2.5 h, 3.5 h, 6 h and 24 h same plate scanned past TLC development. Colloidal  $^{225}\text{Ac}$  <4% 1 h past TLC development.

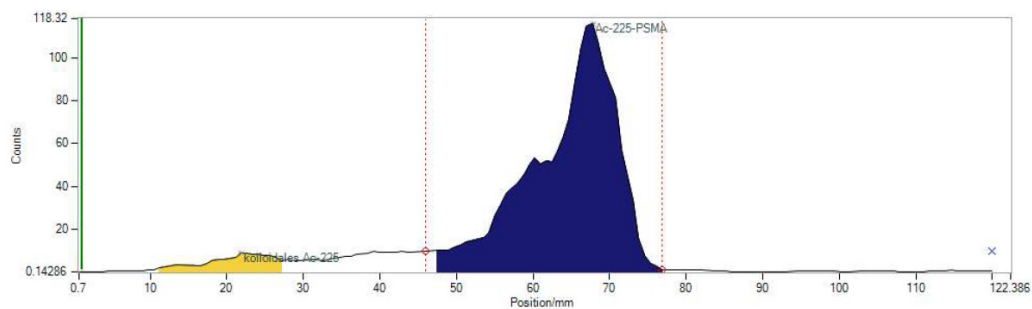

Figure S2: Analytical radio-TLC of another batch of  $^{225}\text{Ac}$ -PSMA-I&T 1 M  $\text{NH}_4\text{Ac}$ :MeOH 1:1 on ITLC-SG) with lesser double peak formation. Colloidal  $^{225}\text{Ac}$  <6% 10 min past TLC development.

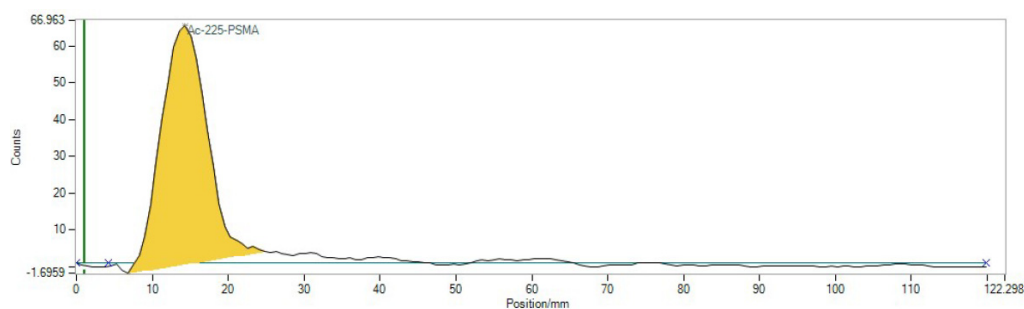

Figure S3: Analytical radio-TLC of  $^{225}\text{Ac}$ -PSMA-I&T on silica gel-aluminum 60 Å F254. RCP >99% 1 h past TLC development.

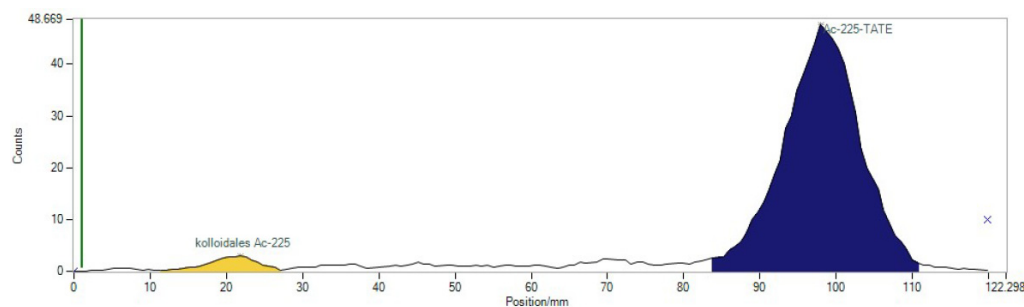

Figure S4: Analytical radio-TLC of  $^{225}\text{Ac}$ -TATE after purification using a CM cartridge (1 M  $\text{NH}_4\text{Ac}$ :MeOH 1:1 on ITLC-SG). Colloidal  $^{225}\text{Ac}$  <4% 1 h past TLC development.

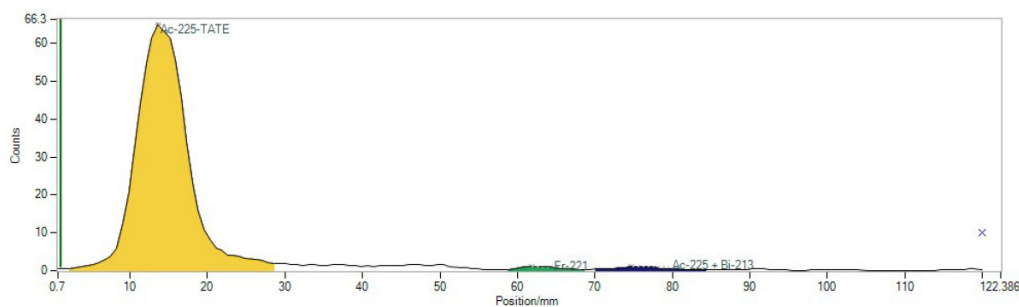

Figure S5: Analytical radio-TLC of  $^{225}\text{Ac}$ -TATE after purification using a CM cartridge (0.1 M citrate pH 5.0 on silica gel-aluminum F254). RCP >97% 1 h past TLC development.

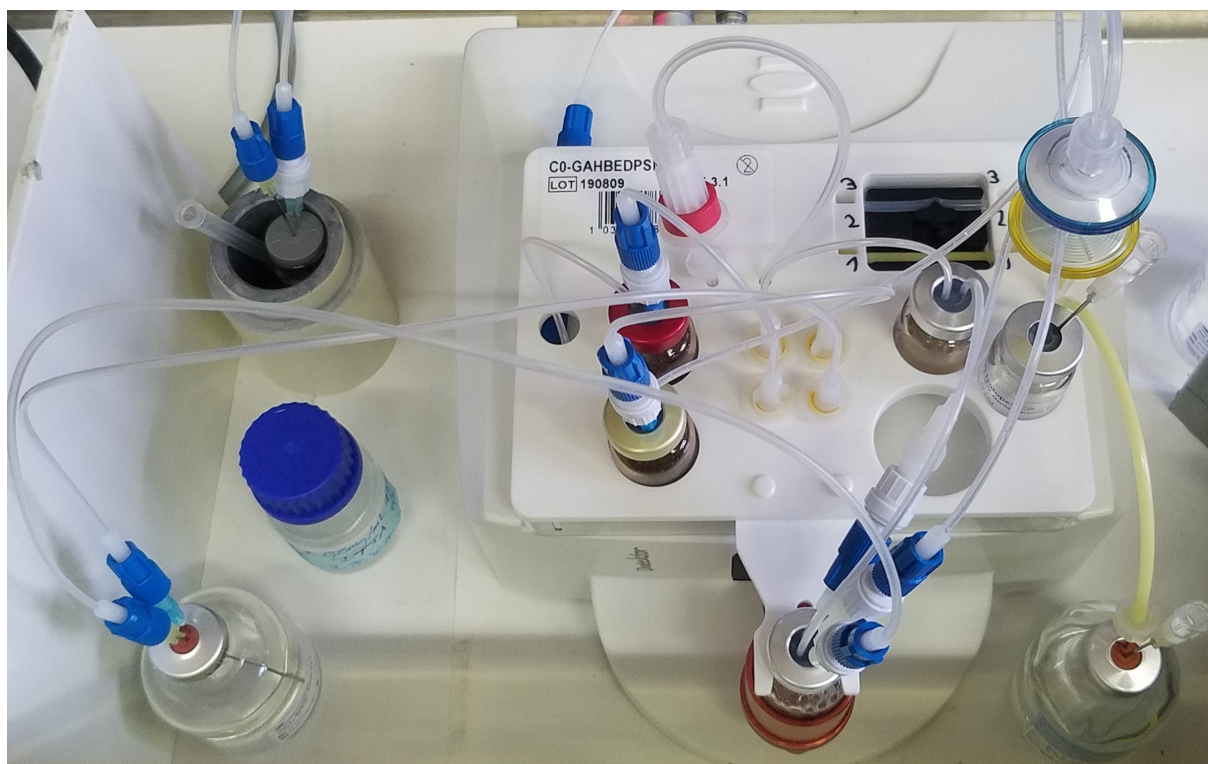

Figure S6: Modular-Lab EAZY module in its final configuration for C18 purification. At the upper left is the KIMAX vial with the activity. The saline in on the bottom left. At the bottom in the middle is the reactor, at the bottom on the right is the waste vial, and on the right side with filters is the product vial. In the center are the buffer vial with the gold cap and the eluent vial with the red cap.



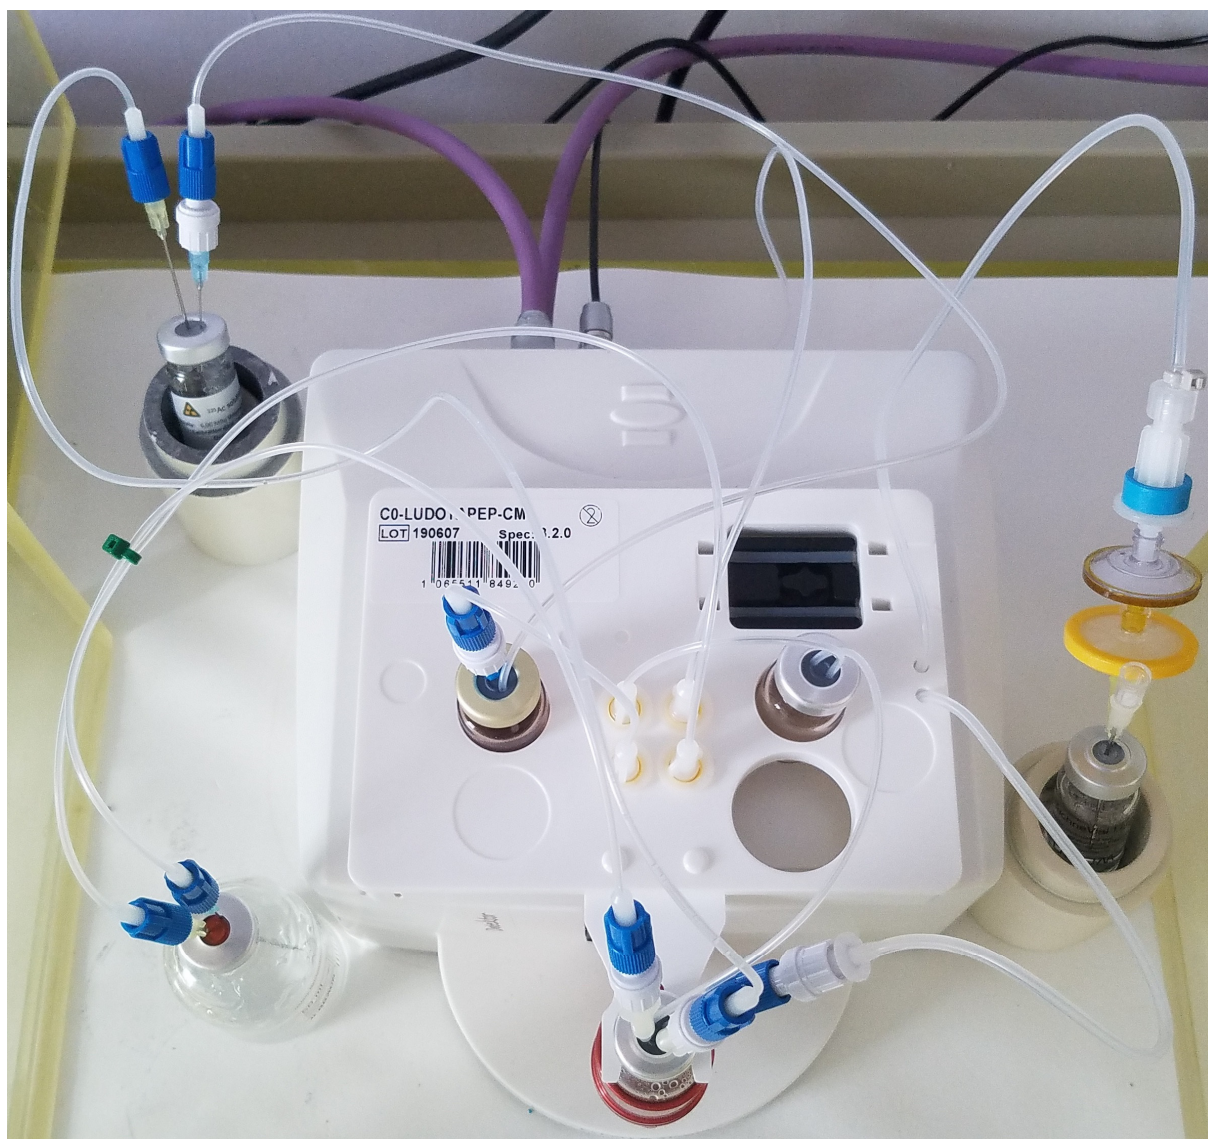

FIGURE S7: Modular-Lab EAZY module in its final configuration for CM purification. At the upper left is the KIMAX vial with the activity. The saline in one the bottom left. The reactor is at the bottom in the middle and the product vial with the filter is on the far right. In the center towards the left is the buffer vial with the gold cap.

Table S1. Overview of <sup>225</sup>Ac-syntheses on ML EAZY

|                 |                                                          |                    |                |                   |               |                 |                  |            |                            |            | measurements of TLC-strips with CoMo-170 (IPS)     |          |             |                                            |             |              |                                                                                           |
|-----------------|----------------------------------------------------------|--------------------|----------------|-------------------|---------------|-----------------|------------------|------------|----------------------------|------------|----------------------------------------------------|----------|-------------|--------------------------------------------|-------------|--------------|-------------------------------------------------------------------------------------------|
| B.#             | A <sup>a</sup> (MBq)<br>HCl <sup>b</sup> (mL)<br>Ac-salt | pre-cursor<br>(μg) | A-C18<br>(MBq) | A-filter<br>(MBq) | A-CM<br>(MBq) | A-prod<br>(MBq) | A-waste<br>(MBq) | pH<br>prod | endo-toxin<br><5 EU<br>/mL | RCY        | silicagel-aluminum<br>citrate buffer<br>0.1 M pH 5 |          |             | ITLC-SA<br>1 M NH <sub>4</sub> Ac:MeOH 1:1 |             |              | comments/<br>changes to the prior syntheses                                               |
|                 | origin                                                   | front              | RCP            | origin            | front         | RCP             |                  |            |                            |            |                                                    |          |             |                                            |             |              |                                                                                           |
| 01              | 1.8<br>0.20<br>NO <sub>3</sub> <sup>-</sup>              | TATE<br>40         | 0.10           | 0.10              |               | 0.37<br>0.12    | 1.16<br>1.16     |            | n.d.                       | 6%         | 12<br>5                                            | 28<br>31 | 30%<br>14%  | 4<br>4                                     | 42<br>56    | 91%<br>7%    | reaction 35 min at 90°C<br>eluent 1.5 ml 50% EtOH + 2 mg<br>DTPA                          |
| 02              | 1.3<br>0.20<br>NO <sub>3</sub> <sup>-</sup>              | TATE<br>40         |                |                   |               | 0.16            | 1.05             |            | n.d.                       | 13%        | 9<br>15                                            | 34<br>21 | 21%<br>41%  | 5<br>5                                     | 48<br>75    | 6%           | pressure program adjusted                                                                 |
| 02b             | 2.4<br>0.20<br>NO <sub>3</sub> <sup>-</sup>              | TATE<br>40         | 0.20           |                   | 0.33          | 0.39            | 2.01             |            | n.d.                       | n.d.       | 60<br>9                                            | 76<br>28 |             | 44<br>13                                   | 137<br>48   |              | pressure program adjusted                                                                 |
| 03              | 2.9<br>0.10<br>NO <sub>3</sub> <sup>-</sup>              | TATE<br>120        | 0.10           | 0.30              |               | 2.10<br>2.20    | 0.30<br>0.04     | 5.6        | yes                        | 75%        |                                                    |          |             | 10                                         | 1430        | >99%         | >10% activity left in two filter<br>1x MILIEX GS (vented) plus<br>1x MILLEX GV (unvented) |
| 04              | 4.1<br>0.15<br>NO <sub>3</sub> <sup>-</sup>              | TATE<br>120        | 0.04           | 0.30              |               | 3.40<br>3.59    | 0.60<br>0.04     | 6.1        | yes                        | 87%        | 515<br>1402                                        | 66<br>4  | 89%<br>>99% | 18<br>10                                   | 543<br>1825 | 97%<br>>99%  | stable method C18                                                                         |
| 05              | 5.1<br>0.2<br>NO <sub>3</sub> <sup>-</sup>               | TATE<br>160        | 0.10           | 0.50              |               | 4.35            | 0.20             | 6.2        | yes                        | 86%        | 331<br>779                                         | 22<br>1  | 94%<br>>99% | 5<br>7                                     | 228<br>773  | 97%<br>>99%  |                                                                                           |
| 06              | 9.7<br>0.40<br>NO <sub>3</sub> <sup>-</sup>              | TATE<br>240        | 0.20           | 0.80              |               | 8.12            | 1.50             | 6.0        | yes                        | 83%        | 239<br>495                                         | 17<br>1  | 93%<br>>99% | 8<br>4                                     | 303<br>894  | 97%<br>>99%  |                                                                                           |
| 07              | 4.9<br>0.10<br>Cl <sup>-</sup>                           | TATE<br>60         | 0.04           | 0.40<br>0.30      |               | 3.34<br>3.53    | 0.20             | 6.0        | n.d.                       | 69%<br>72% | 295<br>300                                         | 12<br>31 | 96%<br>91%  | 8<br>9                                     | 243<br>316  | 97%<br>97%   | product stability after 2 h                                                               |
| 07 <sup>f</sup> |                                                          |                    |                |                   |               |                 |                  |            |                            |            | 605<br>648                                         | 1<br>20  | >99%<br>97% | 3<br>3                                     | 924<br>727  | >99%<br>>99% |                                                                                           |
| 08              | 5.8<br>0.10                                              | TATE<br>100        | 0.10           | 0.30              |               | 4.68            | 0.70             | 5.6        | n.d.                       | 80%        | 285                                                | 25       | 92%         | 6                                          | 335         | 98%          | <5% activity left in two filter                                                           |



| Cl <sup>-</sup> |                                              |             |      |      |                |              |     |      |     | >99%         |           |            | >99%       |              |            | 2x MILLEX GV (vented and unvented)                                               |
|-----------------|----------------------------------------------|-------------|------|------|----------------|--------------|-----|------|-----|--------------|-----------|------------|------------|--------------|------------|----------------------------------------------------------------------------------|
| 09 <sup>g</sup> | 6.2<br>0.14<br>NO <sub>3</sub> <sup>-</sup>  | TATE<br>120 | 0.04 | 0.20 | 5.25           | 0.20         | 4.3 | n.d. | 84% | 1120<br>2000 | 380<br>70 | 75%<br>97% | 70<br>35   | 1410<br>1830 | 95%<br>98% | reaction now at 105°C<br>2x MILLEX GV (vented and unvented)                      |
| 10              | 3.0<br>0.14<br>NO <sub>3</sub> <sup>-</sup>  | TATE<br>60  | 0.04 | 0.04 | 2.20<br>2.70   |              | 4.6 | n.d. | 90% | 541          | 109       | 83%        | 32         | 205          | 86%        | automated C18-conditioning programmed                                            |
| 11              | 3.4<br>0.15<br>NO <sub>3</sub> <sup>-</sup>  | PSMA<br>50  | 0.04 | 0.10 | 2.50           | 0.70<br>0.40 | 4.6 | n.d. | 74% | 117<br>235   | 8<br>1    | 95%        | 25<br>35   | 244<br>592   | 91%        |                                                                                  |
| 12              | 3.2<br>0.15<br>NO <sub>3</sub> <sup>-</sup>  | PSMA<br>25  | 0.10 | 0.20 | 2.10<br>1.90   | 0.80         | 4.7 | n.d. | 65% | 75<br>226    | 16<br>26  | 82%<br>90% | 36<br>98   | 122<br>250   | 77%<br>72% | to less precursor/MBq                                                            |
| 13              | 1.7<br>0.15<br>NO <sub>3</sub> <sup>-</sup>  | PSMA<br>25  | 0.20 | 0.20 | 1.40<br>1.30   | 0.40<br>0.04 | 4.6 | n.d. | 82% | 100<br>262   | 5<br>3    | 95%<br>99% | 23<br>55   | 140<br>347   | 86%<br>86% |                                                                                  |
| 14              | 3.3<br>0.20<br>NO <sub>3</sub> <sup>-</sup>  | PSMA<br>50  | 0.10 | 0.04 | 2.40<br>2.30   | 0.60<br>0.40 | 4.6 | n.d. | 73% | 112<br>300   | 12<br>7   | 90%<br>98% | 45<br>75   | 175<br>375   | 79%<br>83% | First cassette prototype directly obtained from E&Z #200828. irradiated C18 used |
| 15              | 5.4<br>0.10<br>Cl <sup>-</sup>               | TATE<br>50  | 0.10 | 0.10 | 4.20<br>4.10   | 1.20         | 4.6 | n.d. | 78% | 327<br>954   | 6<br>5    | 98%<br>99% | 7<br>5     | 230<br>1019  | 97%<br>99% | pressure programming adjusted for irradiated C18                                 |
| 16              | 16.9<br>0.30<br>NO <sub>3</sub> <sup>-</sup> | TATE<br>340 | 0.20 | 0.40 | 15.40<br>15.00 | 1.40<br>0.30 | 4.5 | n.d. | 91% | 1040<br>2413 | 53<br>25  | 95%<br>99% | 22<br>11   | 778<br>2568  | 97%<br>99% | 3x patient dose <sup>225</sup> Ac-TATE                                           |
| 17              | 17.9<br>0.30<br>NO <sub>3</sub> <sup>-</sup> | PSMA<br>320 | 0.10 | 0.70 | 15.40          | 1.30         | 4.4 | n.d. | 86% | 962<br>2758  | 143<br>49 | 87%<br>99% | 483<br>707 | 1799<br>2945 | 79%<br>81% | 3x patient dose <sup>225</sup> Ac-PSMA                                           |
| 18              | 4.5<br>0.10<br>NO <sub>3</sub> <sup>-</sup>  | PSMA<br>60  | 0.10 | 0.04 | 2.80           | 1.10         | 4.7 | n.d. | 62% | 700<br>580   | 300<br>7  | 60%<br>99% | 100<br>200 | 470<br>900   | 82%<br>82% | pressure programming adjusted to less precursor/MBq                              |
| 19              | 4.3<br>0.10                                  | PSMA<br>120 | 0.04 | 0.20 | 3.30           | 0.50         | 4.7 | n.d. | 79% | 870          | 85        | 88%        | 100        | 960          | 90%        | double amount precursor/MBq                                                      |

|    |                                             |             |       |       |             |              |     |      |            |  |             |          |             |            |              |            |                                                                                                        |
|----|---------------------------------------------|-------------|-------|-------|-------------|--------------|-----|------|------------|--|-------------|----------|-------------|------------|--------------|------------|--------------------------------------------------------------------------------------------------------|
|    | NO <sub>3</sub> <sup>-</sup>                |             |       |       | <b>3.40</b> | 0.50         |     |      |            |  | 2230        | 17       | 99%         | 225        | 2270         | 91%        |                                                                                                        |
| 20 | 2.8<br>0.10<br>NO <sub>3</sub> <sup>-</sup> | PSMA<br>60  | 0.04  | 0.10  | <b>2.20</b> | 0.30         | 4.8 | n.d. | <b>82%</b> |  | 290<br>908  | 37<br>1  | 87%<br>99%  | 9<br>24    | 470<br>940   | 98%<br>98% | stable method                                                                                          |
| 21 | 5.2<br>0.10<br>Cl <sup>-</sup>              | PSMA<br>110 | 0.04  | 0.10  | <b>4.40</b> | 0.30         | 4.8 | yes  | <b>80%</b> |  | 290<br>908  | 37<br>1  | 87%<br>99%  | 9<br>24    | 470<br>940   | 98%<br>98% | first patient dose                                                                                     |
| 22 | 5.5<br>0.10<br>Cl <sup>-</sup>              | PSMA<br>120 | <0.04 | 0.10  | <b>4.90</b> | 0.30         | 4.6 | yes  | <b>89%</b> |  | 500<br>1495 | 30<br>1  | 94%<br>>99% | 100<br>319 | 665<br>1195  | 86%<br>79% | second patient dose                                                                                    |
| 23 | 5.3<br>0.10<br>Cl <sup>-</sup>              | PSMA<br>110 | <0.04 | <0.04 | <b>3.30</b> | 0.90         | 4.1 | yes  | <b>88%</b> |  | 870<br>2200 | 33<br>22 | 96%<br>99%  | 5<br>50    | 1200<br>2260 | 99%<br>98% | third patient dose                                                                                     |
| 24 | 5.1<br>0.40<br>NO <sub>3</sub> <sup>-</sup> | PSMA<br>110 | <0.04 | <0.04 | <b>4.50</b> | 0.60<br>0.40 | 5.9 | yes  | <b>88%</b> |  | 226<br>631  | 17<br>15 | 93%<br>98%  | 25<br>17   | 259<br>676   | 91%<br>98% | fourth patient dose<br>no DTPA in final solution                                                       |
| 25 | 3.4<br>0.10<br>NO <sub>3</sub> <sup>-</sup> | TATE<br>60  |       | 0.10  | <0.04       | <b>2.80</b>  | 6.1 | n.d. | <b>82%</b> |  | 311<br>591  | 51<br>38 | 86%<br>94%  | 83<br>7    | 208<br>1036  | 71%<br>99% | CM-cartridge and LuPep-cassette<br>stability after 18 h >94%                                           |
| 26 | 3.1<br>0.10<br>NO <sub>3</sub> <sup>-</sup> | PSMA<br>60  |       | 0.10  | 0.10        | <b>3.00</b>  | 6.0 | n.d. | <b>97%</b> |  | 385<br>891  | 28<br>28 | 93%<br>99%  | 87<br>49   | 619<br>1217  | 88%<br>96% | CM-cartridge and LuPep-cassette<br>stability after 18 h >90%                                           |
| 27 | 1.2<br>0.15<br>NO <sub>3</sub> <sup>-</sup> | TATE<br>20  |       | 0.10  | 1.10        | <b>1.10</b>  | 6.1 | n.d. | <b>58%</b> |  | 142<br>330  | 11<br>11 | 93%<br>97%  | 12<br>11   | 96<br>307    | 89%<br>97% | 1.2 MBq <sup>225</sup> Ac were added to the<br>reactor after dilution with saline<br>for testing of CM |
| 28 | 5.9<br>0.10<br>Cl <sup>-</sup>              | PSMA<br>60  |       | 0.30  | 0.10        | <b>5.30</b>  | 6.2 | yes  | <b>90%</b> |  | 335<br>755  | 17<br>7  | 95%<br>99%  | 60<br>16   | 1048<br>2065 | 95%<br>99% | stable CM-method<br>fifth patient dose                                                                 |
| 29 | 6.0<br>0.10<br>Cl <sup>-</sup>              | PSMA<br>120 |       | 0.10  | 0.10        | <b>4.90</b>  | 5.5 | yes  | <b>82%</b> |  |             |          | >99%        |            |              | 95%        | sixth patient dose<br>TLC-scanner used for quality<br>control                                          |
| 30 | 6.0<br>0.10<br>Cl <sup>-</sup>              | TATE<br>120 |       | 0.10  | 0.20        | <b>4.70</b>  | 6.2 | yes  | <b>78%</b> |  |             |          | 89%         |            |              | 96%        | seventh patient dose                                                                                   |

<sup>a</sup>A stands for Activity

<sup>b</sup>HCl was always 0.04 M

<sup>c</sup>buffer was always 2 mL NaAc/AcOH 0.1 M from -20°C

<sup>d</sup>reaction pH was always between 5.0–5.5

<sup>e</sup>the second value for activity in on column is always measured 2 h later

<sup>f</sup>TLC stability test 2 h after syntheses

<sup>g</sup>reaction temperature was changed from this batch on for all following batches from 90°C to 105°C

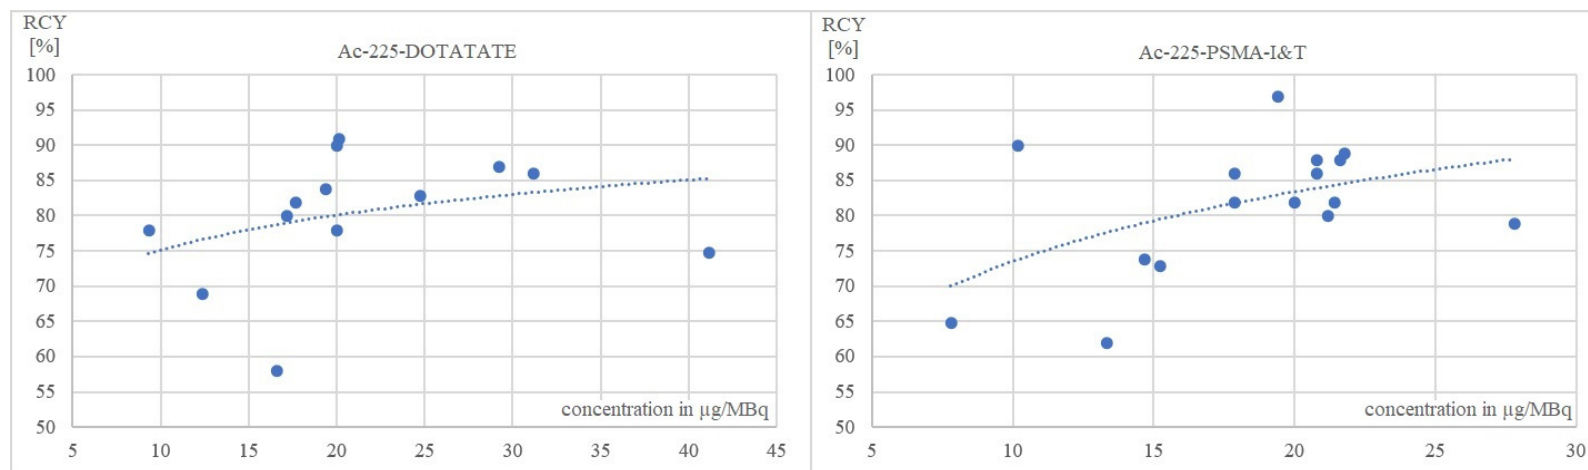

Figure S8: Graphical illustration for table S1 of radiochemical yield (RCY) versus precursor amount per activity for <sup>225</sup>Ac-DOTATATE (n = 13) and for <sup>225</sup>Ac-PSMA-I&T (n = 16) after Modular-Lab EAZY module syntheses.

Table S2. Formation of daughter nuclides of  $^{225}\text{Ac}$  to quasi-stable  $^{209}\text{Bi}$  and stable  $^{205}\text{Tl}$

| nuclide           | possibility | half-life              | modes of decay                                                 | energy                        |
|-------------------|-------------|------------------------|----------------------------------------------------------------|-------------------------------|
| $^{225}\text{Ac}$ | ~100 %      | 9.92 d                 | $\alpha$ (100%)<br>$\gamma$ (3% co-emission)                   | 5.8 MeV<br>60–100 (78) keV    |
| $^{221}\text{Ra}$ | <0.000001 % | 28 s                   | $\alpha$ (100%)                                                | 6.9 MeV                       |
| $^{221}\text{Fr}$ | 100 %       | 4.8 min                | $\alpha$ (100%)<br>$\gamma$ (12% co-emission)                  | 6.3 MeV<br>218 keV            |
| $^{217}\text{Rn}$ | 0.007 %     | 0.54 ms                | $\alpha$ (100%)                                                | 7.9 MeV                       |
| $^{217}\text{At}$ | 100 %       | 32.3 ms                | $\alpha$ (100%)                                                | 7.1 MeV                       |
| $^{213}\text{Po}$ | 97.800154 % | 3.7 $\mu\text{s}$      | $\alpha$ (100%)                                                | 8.4 MeV                       |
| $^{213}\text{Bi}$ | 99.993 %    | 46 min                 | $\alpha$ (2%)<br>$\beta$ (97.8%)<br>$\gamma$ (26% co-emission) | 5.9 MeV<br>1.4 MeV<br>440 keV |
| $^{209}\text{Pb}$ | 100 %       | 3.25 h                 | $\beta$                                                        | 0.6 MeV                       |
| $^{209}\text{Tl}$ | 2.199846 %  | 2.16 min               | $\beta$                                                        | 2.0 MeV                       |
| $^{209}\text{Bi}$ | 100 %       | $1.9 \times 10^{19}$ a | $\alpha$                                                       | 3.1 MeV                       |
| $^{205}\text{Tl}$ | 100 %       | $\infty$               |                                                                |                               |
